# Supplementary material for: Genome Editing Approaches with CRISPR/Cas9 for Cancer Treatment: Critical Appraisal of Preclinical and Clinical Utility, Challenges, and Future Research
Source: MDPI journal article supplement (doi:10.3390/cells11182781), 2022-09-06
Supplement: s1 [file s1]

## Supplementary

**Table S1.** CRISPR gene targets for treatment of malignant disorders, and the experimental setup (*in vivo/ex vivo* and *in vivo*) used to gene editing (knockout, knockdown, knock-in) with the outcome of the experiment

| CRISPR/<br>Cas system  | Target genes<br>(Gene editing)                                               | Function           | In vitro/ex vivo                                                                                                                                                                                      |                                                                                                  | In vivo                                                                      |                                                            | Ref. |
|------------------------|------------------------------------------------------------------------------|--------------------|-------------------------------------------------------------------------------------------------------------------------------------------------------------------------------------------------------|--------------------------------------------------------------------------------------------------|------------------------------------------------------------------------------|------------------------------------------------------------|------|
|                        |                                                                              |                    | Experimental setup                                                                                                                                                                                    | Outcome                                                                                          | Experimental setup                                                           | Outcome                                                    |      |
| Acute Myeloid Leukemia |                                                                              |                    |                                                                                                                                                                                                       |                                                                                                  |                                                                              |                                                            |      |
| SpCas9                 | <i>TCR<sup>KI</sup></i>                                                      | cell<br>receptor   | Electroporation of <i>ex vivo</i> primary T cells with Cas9/gRNA-TRAC RNP and subsequent transduction with AAV6-TCR-HDR viral vector<br><br>Co-incubation of TCR knock-in T cells with ML-2 AML cells | Cell lysis of ML-2 cells expressing HLA-B7 antigen                                               | Intravenous injection of edited T cells into ML-2 tumor xenografted NSG mice | ML-2 tumor xenograft rejection                             | [1]  |
| Bladder cancer         |                                                                              |                    |                                                                                                                                                                                                       |                                                                                                  |                                                                              |                                                            |      |
| Cas9                   | <i>PVT1<sup>KO</sup></i><br><i>ANRIL<sup>KO</sup></i><br><i>(CDKN2B-AS1)</i> | oncogene<br>lncRNA | Co-transfection of T24 and 5637 cells with DOX-inducible Cas9 and gRNA-PVT1 or gRNA-ANRIL expressing plasmids                                                                                         | Induction of apoptosis, reduced proliferation, and migration                                     | N/A                                                                          | N/A                                                        | [2]  |
| Cas13a                 | <i>SMAD7e<sup>KD</sup></i>                                                   | oncogene           | Transfection of T24 and 5637 cells with Cas13a/gRNA expressing plasmid                                                                                                                                | Inhibition of estrogen dependent tumor cells proliferation and migration; induction of apoptosis | Subcutaneous injection of edited T24 cells into Balb/c nude mice             | Reduced growth of T24 tumor xenografts at day 30 end point | [3]  |
| Cas13d                 | <i>MYC<sup>KD</sup></i>                                                      | oncogene           | Transfection of T24 and 5637 cells with hTERT-sensing engineered Cas13d/gRNA expressing plasmid                                                                                                       | Suppression of proliferation, migration, and invasion; induction of apoptosis                    | N/A                                                                          | N/A                                                        | [4]  |

|               |                                          |                  |                                                                                                                                   |                                                                                                    |                                                                                                                 |                                                                                    |      |
|---------------|------------------------------------------|------------------|-----------------------------------------------------------------------------------------------------------------------------------|----------------------------------------------------------------------------------------------------|-----------------------------------------------------------------------------------------------------------------|------------------------------------------------------------------------------------|------|
| dCas9         | <i>SNGH3<sup>KD</sup></i>                | lncRNA           | Transfection of 5637 and SW780 cells with dCas9/gRNA RNP                                                                          | Suppression of cell growth and invasion; elevated apoptosis                                        | N/A                                                                                                             | N/A                                                                                | [5]  |
| Cas9          | <i>HNRNPU<sup>KD</sup></i>               | drug resistance  | Genome-wide lentiCRISPR-gRNA library screening in T24 cells treated with cisplatin                                                | Cell cycle arrest in S-phase; apoptosis; induction of cisplatin sensitivity; increase of apoptosis | Subcutaneous injection of T24 edited cells into Balb/c nu/nu mice treated with cisplatin                        | No significant increase in tumor mass at day 28 end point                          | [6]  |
| Breast cancer |                                          |                  |                                                                                                                                   |                                                                                                    |                                                                                                                 |                                                                                    |      |
| SpCas9        | <i>PD-1<sup>KO</sup> (PDCD1)</i>         | cell receptor    | Electroporation of <i>ex vivo</i> mesothelin-targeted CAR-T cells with Cas9/gRNA RNP, and co-culture with BT-549 cells            | Increased tumor cell lysis; elevated IFN $\gamma$ and IL-2; reduced CAR-T cells exhaustion         | Intravenous injection of PD-1 mesothelin-targeted CAR-T cells into BT-549 tumor orthotopic xenografted NSG mice | Reduction to eradication of established tumor xenografts at day 44 after treatment | [7]  |
| Cas9          | <i>PHF8<sup>KO</sup></i>                 | oncogene         | Co-transfection of MDA-MB-231 cells with Cas9 and gRNA expressing plasmids                                                        | Increased sensitivity to PARPi and cisplatin                                                       | Orthotopic injection of edited MDA-MB-231 cells into mammary fat pad of SCID mice                               | Decreased tumor growth at day 17 end point after PARPi initiation treatment        | [8]  |
| Cas9          | <i>CTCF<sup>KI</sup></i>                 | tumor-suppressor | Transfection of MDA-MB-231 cells with dual plasmid Cas9/gRNA-AAVS1 and CTCF-HDR system packed in targeted polymeric nanoparticles | Inhibition of cell migration                                                                       | Intravenous injection of edited MDA-MB-231 cells into Balb/c nude mice                                          | Reduced metastatic potential                                                       | [9]  |
| SpCas9        | <i>CD274<sup>KO</sup> (PD-L1/ B7-H1)</i> | oncogene         | Transfection of MDA-MB-231 cells with Cas9/gRNA expressing plasmid                                                                | Increased sensitivity to cisplatin, induction of apoptosis                                         | Subcutaneous injection of edited MDA-MB-231 cells into NOD SCID mice                                            | Reduction of tumor growth; increased sensitivity to cisplatin                      | [10] |
| SpCas9        | <i>RILP<sup>KO</sup></i>                 | oncogene         | Co-transduction of MDA-MB-231 and MCF-7 cells with LV-DOX-inducible Cas9 and LV-gRNA-RILP expressing viral vectors                | Inhibition of cell survival, proliferation and tumorigenicity upon DOX induction                   | Subcutaneous injection of edited MDA-MB-231 cells into athymic nude mice                                        | Inhibition of tumor growth and angiogenesis                                        | [11] |

| Cervical cancer      |                                                                                                                              |           |                                                                                         |                                                                            |                                                                                                                               |                                                                                                                                                                                        |      |
|----------------------|------------------------------------------------------------------------------------------------------------------------------|-----------|-----------------------------------------------------------------------------------------|----------------------------------------------------------------------------|-------------------------------------------------------------------------------------------------------------------------------|----------------------------------------------------------------------------------------------------------------------------------------------------------------------------------------|------|
| Cas9                 | <i>HPV18-E6<sup>KO</sup></i>                                                                                                 | oncogene  | Transduction of Cas9-expressing HeLa, HCS-2, and SKG-I cells with AAV-gRNA viral vector | Induction of apoptosis, reduced proliferation                              | Intratumor injection of AAV-gRNA into Cas9-expressing SKG-I-xenografted Balb/c nude mice                                      | Reduction in tumor mass measured at day 42 end point after treatment                                                                                                                   | [12] |
| SpCas9               | <i>HPV16-E6<sup>KO</sup></i>                                                                                                 | oncogene  | Transduction of SiHa and Caski cells with HCAdV-Cas9/gRNA viral vector                  | Activation of p53 and induction of apoptosis, decreased cell proliferation | N/A                                                                                                                           | N/A                                                                                                                                                                                    | [13] |
| SaCas9               | <i>HPV18-E6<sup>KO</sup></i>                                                                                                 | oncogene  | Transduction of HeLa cells with AVV/Cas9/gRNA viral vector                              | Increased cell apoptosis, reduced cell proliferation                       | N/A                                                                                                                           | N/A                                                                                                                                                                                    | [14] |
| Cas9                 | <i>MLL5<sup>KO</sup> (KMT2E)</i><br><i>HPV18-E6<sup>KO</sup></i>                                                             | oncogenes | Transfection of HeLa cells with Cas9/gRNA-MLL5 or -E6 expressing plasmid                | Reduced cell viability, increased sensibility to Cisplatin                 | N/A                                                                                                                           | N/A                                                                                                                                                                                    | [15] |
| SpCas9 <sup>KO</sup> | <i>TERT<sup>KO</sup> (mutant: exon 4 deletion)</i>                                                                           | oncogene  | Electroporation of HeLa cells with Cas9/gRNA expressing plasmid                         | Reduced cell growth and increase cell death                                | Intramuscular injection of TERT <sup>+/-</sup> edited Hela cells into Nude mice                                               | Impairment of TERT <sup>+/-</sup> Hela xenograft tumor growth                                                                                                                          | [16] |
| SpCas9               | <i>HPV18-E6<sup>KO</sup></i><br><i>HPV18 E7<sup>KO</sup></i>                                                                 | oncogenes | Transfection of HeLa cells with an autocatalytic Cas9/gRNA-E6 or -E7 plasmid system     | Inhibition of cell proliferation and motility                              | N/A                                                                                                                           | N/A                                                                                                                                                                                    | [17] |
| SpCas9               | <i>HPV16-E6<sup>KO</sup></i><br><i>HPV16-E7<sup>KO</sup></i><br><i>HPV18-E6<sup>KO</sup></i><br><i>HPV18-E7<sup>KO</sup></i> | oncogenes | Co-transfection of HeLa and Caski cells with Cas9 and gRNA expressing plasmids          | Reduction of cell viability, activation of p53 pathway                     | Intravenous injection of Cas9 and gRNA-16E7 or 18E7 expression plasmids packed in PEGylated liposomes at multiple time points | Eradication of Caski xenograft tumors in Rag1 mice (gRNA-16E7) at day 77 after treatment<br><br>Inhibition of HeLa xenograft tumors in Rag1 mice (gRNA-18E7) at day 46 after treatment | [18] |

|                          |                                                     |                         |                                                                                                                  |                                                                                                                                        |                                                                                                                                                                |                                                                                                                                           |      |
|--------------------------|-----------------------------------------------------|-------------------------|------------------------------------------------------------------------------------------------------------------|----------------------------------------------------------------------------------------------------------------------------------------|----------------------------------------------------------------------------------------------------------------------------------------------------------------|-------------------------------------------------------------------------------------------------------------------------------------------|------|
| Cas9                     | <i>HPV16-E6/HPV16-E7/PD-1<sup>TKO</sup> (PDCD1)</i> | oncogene, cell receptor | Co-transfection of SiHa cells with Cas9 and gRNA-E6/E7/PD-1 expressing plasmids                                  | Increased apoptosis and reduced viability in E6/E7 knockout SiHa cells; decreased expression of PD-L1                                  | In situ electroporation of Cas9 and gRNAs (E6/E7/PD1) plasmids into SiHa orthotopic uterus tumors established in human PMBC inoculated SCID mice (hu-PBL-SCID) | Inhibition of tumor growth evaluated at day 20 after E6/E7/PD1 knockout treatment; increased survival at day 80-100 end point             | [19] |
| Chondrosarcoma           |                                                     |                         |                                                                                                                  |                                                                                                                                        |                                                                                                                                                                |                                                                                                                                           |      |
| SpCas9 <sup>KO</sup>     | <i>SOX9<sup>KO</sup></i>                            | oncogene                | Transfection of SW1353 cells with Cas9/gRNA expressing plasmid                                                   | Reduced proliferation, clonogenicity and migration; increased adhesion, apoptosis and polyploidy; increased sensitivity to doxorubicin | N/A                                                                                                                                                            | N/A                                                                                                                                       | [20] |
| Chronic myeloid leukemia |                                                     |                         |                                                                                                                  |                                                                                                                                        |                                                                                                                                                                |                                                                                                                                           |      |
| SpCas9                   | <i>BCR-ABL1<sup>KO</sup> (ABL1)</i>                 | fusion oncogene         | Electroporation of K562 cells with LV-Cas9/gRNA expressing plasmid                                               | Decrease of clonogenic potential; increase of apoptosis                                                                                | Intratumor injection of Ad-Cas9/gRNA into K562 tumor xenografted athymic nude mice                                                                             | Reduction of tumor mass at day 30 end point after cell inoculation and vector treatment; increased survival at day 64 end point follow-up | [21] |
| SpCas9                   | <i>TNF<sup>KO</sup> (TNF-<math>\alpha</math>)</i>   | oncogene                | Electroporation of K562 cells with Cas9/gRNA expressing plasmid                                                  | Impaired proliferation and clonogenic capacity; increased sensitivity to imatinib                                                      | Subcutaneous injection of edited K562 cells into Balb/c mice pretreated with cyclophosphamide                                                                  | Reduction of xenograft tumor growth at day 21 after subcutaneous cell injection                                                           | [22] |
| Colorectal cancer        |                                                     |                         |                                                                                                                  |                                                                                                                                        |                                                                                                                                                                |                                                                                                                                           |      |
| dCas9-HDAC1              | <i>KRAS<sup>KD</sup></i>                            | oncogene                | Co-transfection of HCT-116 cells with dCas9-HDAC1 expressing plasmid and gRNA-KRAS; or dCas9-HDAC1/gRNA-KRAS RNP | Inhibition of proliferation, clonogenic capacity; increased cell death                                                                 | N/A                                                                                                                                                            | N/A                                                                                                                                       | [23] |

[illegible]

|               |                                                      |                    |                                                                                                                                                                                                  |                                                                                                                |                                                                                                                                                               |                                                                                                |      |
|---------------|------------------------------------------------------|--------------------|--------------------------------------------------------------------------------------------------------------------------------------------------------------------------------------------------|----------------------------------------------------------------------------------------------------------------|---------------------------------------------------------------------------------------------------------------------------------------------------------------|------------------------------------------------------------------------------------------------|------|
| SpCas9        | <i>DGKB<sup>KO</sup></i><br>( <i>DGK</i> )           | DAG<br>metabol.    | Electroporation of ex vivo EGFRvIII targeted CAR-T cells with Cas9/gRNA RNP and co-culture with EGFRvIII-positive U87-MG cells                                                                   | Increased anti-tumor toxicity and cytokine release                                                             | Subcutaneous injection of U87-MG cells into NSG mice and infusion of edited CAR-T cells at day 28 and 30 post-inoculation, followed by adjuvant TMZ treatment | Increased tumor regression at day 56 end point; increased number of tumor-infiltrating T cells | [30] |
| SpCas9        | <i>Alu SINE<sup>DSB</sup></i>                        | retro-transposon   | Transduction of U87 cells and glioblastoma patient-derived primary cells with LV-Cas9/gRNA expressing viral vector                                                                               | Suppression of cell growth; cell cycle G2/M arrest; induction of apoptosis; increased sensitivity to apoptosis | N/A                                                                                                                                                           | N/A                                                                                            | [31] |
| Cas9          | <i>PDCD1<sup>KO</sup></i><br>( <i>PD1/ PD-1</i> )    | T cell<br>receptor | Electroporation of human PBMC with Cas9/gRNA expressing plasmid and subsequent transduction with anti-EGFRvIII CAR-T LV expressing viral vector; co-culture with EGFRvIII-expressing DK-MG cells | Inhibition of cell proliferation                                                                               | N/A                                                                                                                                                           | N/A                                                                                            | [32] |
| Kidney cancer |                                                      |                    |                                                                                                                                                                                                  |                                                                                                                |                                                                                                                                                               |                                                                                                |      |
| SpCas9        | <i>CD274<sup>KO</sup></i><br>( <i>PD-L1/ B7-H1</i> ) | oncogene           | Transfection of 786-0 cells with Cas9/gRNA expressing plasmid                                                                                                                                    | Increased sensitivity to cisplatin, induction of apoptosis                                                     | N/A                                                                                                                                                           | N/A                                                                                            | [10] |
| Liver cancer  |                                                      |                    |                                                                                                                                                                                                  |                                                                                                                |                                                                                                                                                               |                                                                                                |      |
| Cas13a        | <i>TERT/EZH2/ RelA<sup>IKD/TKD</sup></i>             | oncogenes          | Transfection of HepG2 cells with Cas13a/gRNA-TERT/EZH/RelA expressing plasmids<br><br>Transduction of HepG2 cells with AAV-Cas13a/gRNA-TERT/EZH/RelA expressing viral vector                     | Increased apoptosis at higher level by triple knockdown compared with individual knockdown                     | N/A                                                                                                                                                           | N/A                                                                                            | [33] |

|             |                                                                                               |                    |                                                                                                                                     |                                                                        |                                                                                                                   |                                                                            |      |
|-------------|-----------------------------------------------------------------------------------------------|--------------------|-------------------------------------------------------------------------------------------------------------------------------------|------------------------------------------------------------------------|-------------------------------------------------------------------------------------------------------------------|----------------------------------------------------------------------------|------|
| Cas9        | <i>PD-1<sup>KO</sup></i><br>( <i>PDCD1</i> )                                                  | cell<br>receptor   | Electroporation of <i>ex vivo</i> GPC3 targeted CAR T cells with Cas9/gRNA RNP and co-culture with GPC3-expressing PLC/PRF/5 cells  | Enhanced cytokine release and cytotoxic effects                        | Intravenous injection of edited GPC3-CAR T cells into PLC/PRF/5 tumor xenografted NSG mice                        | Inhibition of tumor growth; increase survival at day 20 after treatment    | [34] |
| SpCas9-D10A | <i>MAN2A1-FER<sup>KI</sup></i>                                                                | fusion<br>oncogene | Co-transduction of HUH7 cells with Ad-Cas9-D10A/gRNA expressing viral vector and donor Ad-TK-HDR, followed by Ganciclovir treatment | Increased cell death                                                   | Subcutaneous injection of edited HUH7 into SCID mice, followed by intraperitoneal Ganciclovir injection           | Reduction of tumor mass at week 8 end point after Ganciclovir treatment    | [35] |
| Lung cancer |                                                                                               |                    |                                                                                                                                     |                                                                        |                                                                                                                   |                                                                            |      |
| dCas9-HDAC1 | <i>KRAS<sup>KD</sup></i>                                                                      | oncogene           | Co-transfection of H358 cells with dCas9-HDAC1 expressing plasmid and gRNA-KRAS; or dCas9-HDAC1/gRNA-KRAS RNP                       | Inhibition of proliferation, clonogenic capacity; increased cell death | N/A                                                                                                               | N/A                                                                        | [23] |
| Cas9        | <i>MAPK7<sup>KO</sup></i><br>( <i>ERK5</i> )<br><i>MAP2K5<sup>KO</sup></i><br>( <i>MEK5</i> ) | oncogene           | Co-transfection of H1975 and A549 cells with Cas9 and gRNA-ERK5 or -MEK5 expressing plasmids                                        | Reduced proliferation rate                                             | Injection of ERK5 or MEK5 edited H460 cells into Balb/c mice                                                      | Reduced tumor growth at day 16-18 end point                                | [36] |
| SpCas9      | <i>EGFR<sup>KO</sup></i><br>( <i>mutant: L858R</i> )                                          | oncogene           | Co-transduction of H1975 cells with Ad-Cas9 and Ad-gRNA expressing viral vectors                                                    | Reduced cell proliferation and viability                               | Intratumor injection of Cas9 and gRNA-EGFRmut Ad vectors into H1975 or A549 tumor xenografted nude mice           | Inhibition of tumor growth and increased survival rate at day 31 end point | [37] |
| SpCas9      | <i>EGFR<sup>KO</sup></i><br>( <i>mutant: L858R</i> )                                          | oncogene           | Transduction of H1975 cells with LV-Cas9/gRNA expressing viral vector                                                               | Decrease of cell proliferation and clonogenic capacity                 | Subcutaneous injection of edited H1975 cells into Balb/c nude mice                                                | Reduction of tumor burden                                                  | [38] |
| LbCas12a    | <i>EGFR<sup>KO</sup></i>                                                                      | oncogene           | Transduction of A549 or H1299 cells with oncolytic Ad-Cas9/gRNA expressing viral vector                                             | Reduced cell viability                                                 | Intratumor injection of oncolytic Ad/Cas9/gRNA-EGFR expressing viral vector into A549 tumor xenografted nude mice | Inhibition of tumor growth at day 35 end point                             | [39] |

[illegible]



[illegible]

[illegible]

|       |                                                     |          |                                                                                                                                  |                                                                                                                         |                                                                                                                                                                                                                                                                                                                                                                                                                                                                                                                    |                                                                                                                                                                                                                                        |      |
|-------|-----------------------------------------------------|----------|----------------------------------------------------------------------------------------------------------------------------------|-------------------------------------------------------------------------------------------------------------------------|--------------------------------------------------------------------------------------------------------------------------------------------------------------------------------------------------------------------------------------------------------------------------------------------------------------------------------------------------------------------------------------------------------------------------------------------------------------------------------------------------------------------|----------------------------------------------------------------------------------------------------------------------------------------------------------------------------------------------------------------------------------------|------|
| Cas9  | <i>HIF1A</i> <sup>KO</sup><br>( <i>HIF-1α</i> )     | oncogene | Transfection of BxPC-3 cells with R8-dGR targeted nanolipoplexes loaded with Cas9/gRNA expressing plasmid and w/o paclitaxel     | Decreased proliferation in HIF-1 KO cells; enhanced sensitivity to paclitaxel                                           | <p>Intravenous injection of R8-dGR targeted nanolipoplexes loaded with Cas9/gRNA expressing plasmid and w/o paclitaxel, into subcutaneous BxPC-3 tumor xenografted mice;</p> <p>Intravenous injection of R8-dGR targeted nanolipoplexes loaded with Cas9/gRNA expressing plasmid and w/o paclitaxel into BxPC-3 metastatic mice (intravenous inoculation)</p>                                                                                                                                                      | Inhibition of xenograft tumor growth at day 7 end point after treatment (HIF-1 KO and paclitaxel); increased survival rates in metastatic models at day 30-40 end point                                                                | [54] |
| CasRx | <i>KRAS</i> <sup>KD</sup><br>(mutant: <i>G12D</i> ) | oncogene | Transduction of PANC-1 and AsPC-1 cells with LV-CasRx/gRNA expressing viral vector, and subsequent treatment of with gemcitabine | Inhibition of proliferation, cell growth and clonogenic potential in PANC-1 cells; increased sensitivity to gemcitabine | <p>For xenograft tumor model: subcutaneous injection of edited PANC-1 cells into Balb/c mice;</p> <p>For orthotopic model: injection of AsPC-1 cells into pancreas of Balb/c mice; subsequent intraperitoneal injection of AAV8/CasRx/gRNA expressing viral vector w/o further gemcitabine treatment;</p> <p>For PDX model: subcutaneous implantation of patient tumor tissue fragments into non-obese diabetic SCID mice; subsequent intraperitoneal injection of AAV8/CasRx/gRNA expressing viral vector w/o</p> | Inhibition of tumor growth and increased sensitivity to gemcitabine in xenograft model; increased survival rate in orthotopic model gemcitabine treated at day 100 end point; inhibition of PDX tumor growth w/o gemcitabine treatment | [55] |

|                       |                                            |                 |                                                                                                                                           |                                                                                                                            |                                                                                                                                                                                  |                                                                                                                                     |      |
|-----------------------|--------------------------------------------|-----------------|-------------------------------------------------------------------------------------------------------------------------------------------|----------------------------------------------------------------------------------------------------------------------------|----------------------------------------------------------------------------------------------------------------------------------------------------------------------------------|-------------------------------------------------------------------------------------------------------------------------------------|------|
|                       |                                            |                 |                                                                                                                                           |                                                                                                                            | further gemcitabine treatment                                                                                                                                                    |                                                                                                                                     |      |
| Cas9                  | <i>TGFBR2<sup>KO</sup></i>                 | oncogene        | N/A                                                                                                                                       | N/A                                                                                                                        | Electroporation of <i>ex vivo</i> mesothelin targeted CAR-T cells with Cas9/gRNA RNP, and subsequent intratumor or intravenous injection of edited CAR-T cells into PDX NPG mice | Complete PDX tumor eradication after intratumor or intravenous injection at day 42 end point after treatment                        | [41] |
| Prostate cancer       |                                            |                 |                                                                                                                                           |                                                                                                                            |                                                                                                                                                                                  |                                                                                                                                     |      |
| SpCas9                | <i>FOXA1<sup>KO</sup></i>                  | oncogene        | Transfection of LNCaP cells with Cas9/gRNA expressing plasmid                                                                             | Increased expression of pro-apoptotic genes, cell cycle progression and epithelial phenotype associated genes              | N/A                                                                                                                                                                              | N/A                                                                                                                                 | [56] |
| nSpCas9-D10A          | <i>TMEM135-DEUP1<sup>KI</sup> (CCDC67)</i> | fusion oncogene | Co-transduction of PC-3 and DU145 cells with Ad-nCas9/gRNA expressing viral vector and donor Ad-TK-HDR, followed by Ganciclovir treatment | Increased cell death                                                                                                       | Subcutaneous injection of edited PC-3 and DU145 cells into SCID mice, followed by intraperitoneal Ganciclovir injection                                                          | Reduction of tumor mass at week 4 end point after treatment; inhibition of metastasis; increased survival at day 30 after treatment | [35] |
| Renal cancer (kidney) |                                            |                 |                                                                                                                                           |                                                                                                                            |                                                                                                                                                                                  |                                                                                                                                     |      |
| SpCas9                | <i>ELOVL2<sup>KO</sup></i>                 | lipid metabol.  | Transfection of ACHN cells with Cas9/gRNA expressing plasmid                                                                              | Decreased cell proliferation; increased expression levels of pro-apoptotic genes a decreased level of anti-apoptotic genes | Subcutaneous injection of edited ACHN cells into Balb/c mice                                                                                                                     | Impairment or complete suppression of tumor xenograft at day 80-100 end point                                                       | [57] |
| Sarcoma (Ewings)      |                                            |                 |                                                                                                                                           |                                                                                                                            |                                                                                                                                                                                  |                                                                                                                                     |      |
| SpCas9                | <i>EWSR1-FLII<sup>KO</sup></i>             | fusion oncogene | Transduction of A673 and RD-ES cells with LV-Cas9/gRNA expressing viral vector                                                            | Inhibition of cell proliferation, survival and conogenicity                                                                | Intratumor injection of Ad-Cas9/gRNA expressing viral vector into A673 xenografted tumors of athymic mice;                                                                       | Inhibition of A673 tumor xenograft growth at day 25 end point after treatment; prolonged survival in A673 xenografted mice at day   | [21] |

|                                          |                                       |                    |                                                                                                                               |                                                               |                                                                                        |                                                                                                                |      |
|------------------------------------------|---------------------------------------|--------------------|-------------------------------------------------------------------------------------------------------------------------------|---------------------------------------------------------------|----------------------------------------------------------------------------------------|----------------------------------------------------------------------------------------------------------------|------|
|                                          |                                       |                    |                                                                                                                               |                                                               | Intratumor injection of Ad-Cas9/gRNA expressing vector into PDX tumors of athymic mice | 80; inhibition of PDX tumor growth at day 28 end point after treatment; prolonged survival at day 70 end point |      |
| SpCas9                                   | <i>EWSR1-FLI1</i> <sup>KO</sup>       | fusion oncogene    | Transduction of A653 cells with LV-Cas9 expressing viral vector, followed by transduction with LV-RNA expressing viral vector | Inhibition of cell proliferation; induction of senescence     | N/A                                                                                    | N/A                                                                                                            | [58] |
| Thyroid cancer (squamous cell carcinoma) |                                       |                    |                                                                                                                               |                                                               |                                                                                        |                                                                                                                |      |
| SpCas9                                   | <i>HDAC1/HDAC2</i> <sup>IKO/DKO</sup> | oncogenes          | Transduction of SW579 cells with LV-Cas9 and LV-gRNA-HDAC1+/-HDAC2 expressing viral vectors                                   | Increased cell death only in double knockout transduced cells | N/A                                                                                    | N/A                                                                                                            | [59] |
| Thyroid cancer (anaplastic carcinoma)    |                                       |                    |                                                                                                                               |                                                               |                                                                                        |                                                                                                                |      |
| nSpCas9-D10A                             | <i>miR-146B</i> <sup>KD</sup>         | oncogenic microRNA | Transfection of KTC1 cells with nCas9/gRNA expressing plasmid                                                                 | Reduction of cell proliferation, migration and clonogenicity  | Subcutaneous injection of edited KTC1 cells into nude mice                             | Inhibition of tumor growth                                                                                     | [60] |

#### Abbreviation for gene editing mechanisms:

DEL – deletion  
DKO – double knockout  
DSB – double-strand break  
IKD – individual knockdown  
IKO – individual knockout

KD – knockdown  
KI – knock-in  
KO – knockout  
TKD – triple knockdown  
TK – thymidine kinase

#### Abbreviation for gene names:

ABL1 (BCR-ABL1) – ABL Proto-Oncogene 1, Non-Receptor Tyrosine Kinase  
ALK – ALK Receptor Tyrosine Kinase  
Alu SINE – Alu Short interspersed nuclear elements  
BRAF – B-Raf Proto-Oncogene, Serine/Threonine Kinase  
BSG (CD147) – Basigin (Ok Blood Group)  
CASP3 – Caspase 3  
CD274 (PD-L1/ B7-H1) – CD274 Molecule, Programmed Death Ligand 1

KRAS – Kirsten Rat Sarcoma Proto-Oncogene  
LIFR – Leukemia Inhibitory Factor Receptor Subunit Alpha  
MAN2A1 – Mannosidase Alpha Class 2A Member 1  
MAP2K5 (MEK5) – Mitogen-Activated Protein Kinase Kinase 5  
MAPK7 (ERK5) – Mitogen-Activated Protein Kinase 7  
MIR146B – MicroRNA 146b  
MTF1 – Metal Regulatory Transcription Factor 1  
MYC – MYC Proto-Oncogene, BHLH Transcription Factor

CDK9 – Cyclin Dependent Kinase 9  
 CDKN2B-AS1 (ANRIL) - CDKN2B Antisense RNA 1  
 CTCF – CCCTC-Binding Factor  
 CTLA4 – Cytotoxic T-Lymphocyte Associated Protein 4  
 DEUP1 (CCDC67) – Deuterosome Assembly Protein 1  
 DGKB (DGK) – Diacylglycerol Kinase Beta  
 EGFR – Epidermal Growth Factor Receptor  
 ELOVL2 – ELOVL Fatty Acid Elongase 2  
 EML4 – EMAP Like 4  
 EWSR1 – EWS RNA Binding Protein 1  
 EZH2 – Enhancer of Zeste 2 Polycomb Repressive Complex 2 Subunit  
 FDPS – Farnesyl Diphosphate Synthase  
 FER – FER Tyrosine Kinase  
 FLI1 – Fli-1 Proto-Oncogene, ETS Transcription Factor  
 FOXA1 – Forkhead Box A1  
 HDAC1 – Histone Deacetylase 1  
 HDAC2 – Histone Deacetylase 2  
 HIF1A (HIF-1 $\alpha$ ) – Hypoxia Inducible Factor 1 Subunit Alpha  
 HMGCR – 3-Hydroxy-3-Methylglutaryl-CoA Reductase  
 HNRNPU – Heterogeneous Nuclear Ribonucleoprotein U  
 HPV16 E6 / HPV18 E6 – Human Papilloma Virus 16/18 serotype E6-associated protein  
 HPV16 E7 / HPV18 E7 – Human Papilloma Virus 16/18 serotype E7-associated protein  
 KMT2E (MLL5) – Lysine Methyltransferase 2E (Inactive)  
 KRAS – KRAS Proto-Oncogene, GTPase

#### Other abbreviations:

AAV – adenoassociated virus  
 AAVS1 – AAV integration site 1  
 AML – acute myeloid leukemia  
 dCas9 – dead Cas9  
 GPC3- glypican 3  
 HCA $\Delta$ V – high-capacity adenovirus  
 HDR – homology directed recombination  
 LV – lentivirus  
 metabol. – metabolism  
 nCas9 – nickase Cas9  
 PARPi – poly (ADP-ribose) polymerase inhibitor  
 RNP – ribonucleoprotein  
 TMZ – temozolomide  
 w/o – with or without

PDCD1 (PD1/ PD-1) – Programmed Cell Death 1  
 PHF8 – PHD Finger Protein 8  
 PLAUR – Plasminogen Activator, Urokinase Receptor  
 PLK1 – Polo Like Kinase 1  
 PTGS2 (COX-2) – Prostaglandin-Endoperoxide Synthase 2  
 PVT1 – Plasmacytoma Variant Translocation 1  
 RELA (RelA) – RELA Proto-Oncogene, NF-KB Subunit  
 RILP – Rab Interacting Lysosomal Protein  
 SIRT6 – Sirtuin 6  
 SMAD7e – SMAD Family Member 7 enhancer RNA  
 SNCA – Synuclein Alpha  
 SNGH3 – Small Nucleolar RNA Host Gene 3  
 SOX9 – SRY-Box Transcription Factor 9  
 TCR – T Cell Receptor  
 TERT – Telomerase Reverse Transcriptase  
 TGFBR2 – Transforming Growth Factor Beta Receptor 2  
 TMEM135 – Transmembrane Protein 135  
 TNF (TNF- $\alpha$ ) – Tumor Necrosis Factor  
 TP53 – Tumor Protein P53  
 TP63 – Tumor Protein P63

## References

1. Albers, J.J.; Ammon, T.; Gosmann, D.; Audehm, S.; Thoene, S.; Winter, C.; Secci, R.; Wolf, A.; Stelzl, A.; Steiger, K.; et al. Gene Editing Enables T-Cell Engineering to Redirect Antigen Specificity for Potent Tumor Rejection. *Life Science Alliance* **2019**, *2*, e201900367, doi:10.26508/lsa.201900367.
2. Peng, L.; Pan, P.; Chen, J.; Yu, X.; Wu, J.; Chen, Y. A Tetracycline-inducible CRISPR / Cas9 System, Targeting Two Long Non-coding RNAs, Suppresses the Malignant Behavior of Bladder Cancer Cells. *Oncology Letters* **2018**, doi:10.3892/ol.2018.9157.
3. Che, W.; Ye, S.; Cai, A.; Cui, X.; Sun, Y. CRISPR - Cas13a Targeting the Enhancer RNA - SMAD7e Inhibits Bladder Cancer Development Both in Vitro and in Vivo. *Frontiers in Molecular Biosciences* **2020**, *7*, 607740, doi:10.3389/fmolb.2020.607740.
4. Zhuang, C.; Zhuang, C.; Zhou, Q.; Huang, X.; Gui, Y.; Lai, Y.; Yang, S. Engineered CRISPR / Cas13d Sensing hTERT Selectively Inhibits the Progression of Bladder Cancer In Vitro. *Frontiers in Molecular Biosciences* **2021**, *8*, 646412, doi:10.3389/fmolb.2021.646412.
5. Cao, Y.; Hu, Q.; Zhang, R.; Li, L.; Guo, M.; Wei, H.; Zhang, L.; Wang, J.; Li, C. Knockdown of Long Non -Coding RNA SNHG3 by CRISPR - dCas9 Inhibits the Progression of Bladder Cancer. *Frontiers in Molecular Biosciences* **2021**, *8*, 657145, doi:10.3389/fmolb.2021.657145.
6. Shi, Z.; Hao, L.; Han, X.; Wu, Z.-X.; Pang, K.; Dong, Y.; Qin, J.; Wang, G.; Zhang, X.; Xia, T.; et al. Targeting HNRNPU to Overcome Cisplatin Resistance in Bladder Cancer. *Molecular Cancer* **2022**, *21*, 37, doi:10.1186/s12943-022-01517-9.
7. Hu, W.; Zi, Z.; Jin, Y.; Li, G.; Shao, K.; Cai, Q.; Ma, X.; Wei, F. CRISPR / Cas9 -Mediated PD -1 Disruption Enhances Human Mesothelin-Targeted CAR T Cell Effector Functions. *Cancer Immunology, Immunotherapy* **2019**, *68*, 365–377, doi:10.1007/s00262-018-2281-2.
8. Ma, S.; Zhang, J.; Guo, Q.; Cao, C.; Bao, K.; Liu, L.; Chen, C.D.; Liu, Z.; Yang, J.; Yang, N.; et al. Disrupting PHF8 - TOPBP1 Connection Elicits a Breast Tumor-Specific Vulnerability to Chemotherapeutics. *Cancer Letters* **2022**, *530*, 29–44, doi:10.1016/j.canlet.2022.01.010.
9. Duan, J.; Bao, C.; Xie, Y.; Guo, H.; Liu, Y.; Li, J.; Liu, R.; Li, P.; Bai, J.; Yan, Y.; et al. Targeted Core-Shell Nanoparticles for Precise CTCF Gene Insert in Treatment of Metastatic Breast Cancer. *Bioactive Materials* **2022**, *11*, 1–14, doi:10.1016/j.bioactmat.2021.10.007.

10. Wu, X.; Li, Y.; Liu, X.; Chen, C.; Harrington, S.M.; Cao, S.; Xie, T.; Pham, T.; Mansfield, A.S.; Yan, Y.; et al. Targeting B7 - H1 ( PD - L1 ) Sensitizes Cancer Cells to Chemotherapy. *Heliyon* **2018**, *4*, e01039, doi:10.1016/j.heliyon.2018.e01039.
11. Singhal, J.; Chikara, S.; Horne, D.; Awasthi, S.; Salgia, R.; Singhal, S.S. Targeting RLIP with CRISPR / Cas9 Controls Tumor Growth. *Carcinogenesis* **2021**, *42*, 48–57, doi:10.1093/carcin/bgaa048.
12. Yoshida, T.; Saga, Y.; Urabe, M.; Uchibori, R.; Matsubara, S.; Fujiwara, H.; Mizukami, H. CRISPR / Cas9 -mediated Cervical Cancer Treatment Targeting Human Papillomavirus E6 . *Oncology Letters* **2018**, doi:10.3892/ol.2018.9815.
13. Ehrke-Schulz, E.; Heinemann, S.; Schulte, L.; Schiwon, M.; Ehrhardt, A. Adenoviral Vectors Armed with PAPILLOMAVIRUS Oncogene Specific CRISPR / Cas9 Kill Human - Papillomavirus - Induced Cervical Cancer Cells . *Cancers* **2020**, *12*, 1934, doi:10.3390/cancers12071934.
14. Noroozi, Z.; Shamsara, M.; Valipour, E.; Esfandyari, S.; Ehghaghi, A.; Monfaredan, A.; Azizi, Z.; Motevaseli, E.; Modarressi, M.H. Antiproliferative Effects of AAV -Delivered CRISPR / Cas9 -Based Degradation of the HPV18 - E6 Gene in HeLa Cells. *Scientific Reports* **2022**, *12*, 2224, doi:10.1038/s41598-022-06025-w.
15. Pirouzfar, M.; Amiri, F.; Dianatpour, M.; Takhshid, M.A. CRISPR / Cas9 -Mediated Knockout of MLL5 Enhances Apoptotic Effect of Cisplatin in HeLa Cells in Vitro. *EXCLI journal* **2020**, *19*, 170–182, doi:10.17179/excli2019-1957.
16. Wen, L.; Zhao, C.; Song, J.; Ma, L.; Ruan, J.; Xia, X.; Chen, Y.E.; Zhang, J.; Ma, P.X.; Xu, J. CRISPR / Cas9 - Mediated TERT Disruption in Cancer Cells . *International Journal of Molecular Sciences* **2020**, *21*, 653, doi:10.3390/ijms21020653.
17. Tian, R.; Liu, J.; Fan, W.; Li, R.; Cui, Z.; Jin, Z.; Huang, Z.; Xie, H.; Li, L.; Huang, Z.; et al. Gene Knock-out Chain Reaction Enables High Disruption Efficiency of HPV18 E6 / E7 Genes in Cervical Cancer Cells. *Molecular Therapy - Oncolytics* **2022**, *24*, 171–179, doi:10.1016/j.omto.2021.12.011.
18. Jubair, L.; Fallaha, S.; McMillan, N.A.J. Systemic Delivery of CRISPR / Cas9 Targeting HPV Oncogenes Is Effective at Eliminating Established Tumors . *Molecular Therapy* **2019**, *27*, 2091–2099, doi:10.1016/j.ymthe.2019.08.012.
19. Zhen, S.; Lu, J.; Liu, Y.-H.; Chen, W.; Li, X. Synergistic Antitumor Effect on Cervical Cancer by Rational Combination of PD1 Blockade and CRISPR - Cas9 -Mediated HPV Knockout. *Cancer Gene Therapy* **2020**, *27*, 168–178, doi:10.1038/s41417-019-0131-9.
20. Stöckl, S.; Lindner, G.; Li, S.; Schuster, P.; Haferkamp, S.; Wagner, F.; Prodinger, P.M.; Multhoff, G.; Boxberg, M.; Hillmann, A.; et al. SOX9 Knockout Induces Polyploidy and Changes Sensitivity to Tumor Treatment Strategies in a Chondrosarcoma Cell Line . *International Journal of Molecular Sciences* **2020**, *21*, 7627, doi:10.3390/ijms21207627.
21. Martinez-Lage, M.; Torres-Ruiz, R.; Puig-Serra, P.; Moreno-Gaona, P.; Martin, M.C.; Moya, F.J.; Quintana-Bustamante, O.;



Garcia-Silva, S.; Carcaboso, A.M.; Petazzi, P.; et al. In Vivo CRISPR / Cas9 Targeting of Fusion Oncogenes for Selective Elimination of Cancer Cells. *Nature Communications* **2020**, *11*, 5060, doi:10.1038/s41467-020-18875-x.

22. Shen, N.; Liu, S.; Cui, J.; Li, Q.; You, Y.; Zhong, Z.; Cheng, F.; Guo, A.-Y.; Zou, P.; Yuan, G.; et al. Tumor Necrosis Factor  $\alpha$  Knockout Impaired Tumorigenesis in Chronic Myeloid Leukemia Cells Partly by Metabolism Modification and miRNA Regulation. *OncoTargets and Therapy* **2019**, *Volume 12*, 2355–2364, doi:10.2147/OTT.S197535.
23. Liu, J.; Sun, M.; Cho, K.B.; Gao, X.; Guo, B. A CRISPR - Cas9 Repressor for Epigenetic Silencing of KRAS . *Pharmacological Research* **2021**, *164*, 105304, doi:10.1016/j.phrs.2020.105304.
24. Zhou, M.; Liu, X.; Li, Z.; Huang, Q.; Li, F.; Li, C.-Y. Caspase-3 Regulates the Migration, Invasion and Metastasis of Colon Cancer Cells: Metastasis of Colon Cancer Cells. *International Journal of Cancer* **2018**, *143*, 921–930, doi:10.1002/ijc.31374.
25. Shi, L.; Meng, T.; Zhao, Z.; Han, J.; Zhang, W.; Gao, F.; Cai, J. CRISPR Knock out CTLA -4 Enhances the Anti-Tumor Activity of Cytotoxic T Lymphocytes. *Gene* **2017**, *636*, 36–41, doi:10.1016/j.gene.2017.09.010.
26. Gao, S.; Soares, F.; Wang, S.; Wong, C.C.; Chen, H.; Yang, Z.; Liu, W.; Go, M.Y.Y.; Ahmed, M.; Zeng, Y.; et al. CRISPR Screens Identify Cholesterol Biosynthesis as a Therapeutic Target on Stemness and Drug Resistance of Colon Cancer. *Oncogene* **2021**, *40*, 6601–6613, doi:10.1038/s41388-021-01882-7.
27. Wan, T.; Chen, Y.; Pan, Q.; Xu, X.; Kang, Y.; Gao, X.; Huang, F.; Wu, C.; Ping, Y. Genome Editing of Mutant KRAS through Supramolecular Polymer-Mediated Delivery of Cas9 Ribonucleoprotein for Colorectal Cancer Therapy. *Journal of Controlled Release* **2020**, *322*, 236–247, doi:10.1016/j.jconrel.2020.03.015.
28. Tang, W.; Ramasamy, K.; Pillai, S.M.A.; Santhamma, B.; Konda, S.; Pitta Venkata, P.; Blankenship, L.; Liu, J.; Liu, Z.; Altwegg, K.A.; et al. LIF / LIFR Oncogenic Signaling Is a Novel Therapeutic Target in Endometrial Cancer. *Cell Death Discovery* **2021**, *7*, 216, doi:10.1038/s41420-021-00603-z.
29. Yoshida, M.; Yokota, E.; Sakuma, T.; Yamatsuji, T.; Takigawa, N.; Ushijima, T.; Yamamoto, T.; Fukazawa, T.; Naomoto, Y. Development of an Integrated CRISPRi Targeting  $\Delta$  Np63 for Treatment of Squamous Cell Carcinoma. *Oncotarget* **2018**, *9*, 29220–29232, doi:10.18632/oncotarget.25678.
30. Jung, I.-Y.; Kim, Y.-Y.; Yu, H.-S.; Lee, M.; Kim, S.; Lee, J. CRISPR / Cas9 - Mediated Knockout of DGK Improves Antitumor Activities of Human T Cells . *Cancer Research* **2018**, *78*, 4692–4703, doi:10.1158/0008-5472.CAN-18-0030.
31. Głow, D.; Maire, C.L.; Schwarze, L.I.; Lamszus, K.; Fehse, B. CRISPR -to- Kill ( C2K )– Employing the Bacterial Immune System to Kill Cancer Cells . *Cancers* **2021**, *13*, 6306, doi:10.3390/cancers13246306.
32. Nakazawa, T.; Natsume, A.; Nishimura, F.; Morimoto, T.; Matsuda, R.; Nakamura, M.; Yamada, S.; Nakagawa, I.; Motoyama, Y.;

- Park, Y.-S.; et al. Effect of CRISPR / Cas9 - Mediated PD -1- Disrupted Primary Human Third - Generation CAR - T Cells Targeting EGFRvIII on In Vitro Human Glioblastoma Cell Growth . *Cells* **2020**, *9*, 998, doi:10.3390/cells9040998.
33. Gao, J.; Luo, T.; Lin, N.; Zhang, S.; Wang, J. A New Tool for CRISPR - Cas13a - Based Cancer Gene Therapy . *Molecular Therapy - Oncolytics* **2020**, *19*, 79–92, doi:10.1016/j.omto.2020.09.004.
  34. Guo, X.; Jiang, H.; Shi, B.; Zhou, M.; Zhang, H.; Shi, Z.; Du, G.; Luo, H.; Wu, X.; Wang, Y.; et al. Disruption of PD -1 Enhanced the Anti -Tumor Activity of Chimeric Antigen Receptor T Cells Against Hepatocellular Carcinoma . *Frontiers in Pharmacology* **2018**, *9*, 1118, doi:10.3389/fphar.2018.01118.
  35. Chen, Z.-H.; Yu, Y.P.; Zuo, Z.-H.; Nelson, J.B.; Michalopoulos, G.K.; Monga, S.; Liu, S.; Tseng, G.; Luo, J.-H. Targeting Genomic Rearrangements in Tumor Cells through Cas9 -Mediated Insertion of a Suicide Gene. *Nature Biotechnology* **2017**, *35*, 543–550, doi:10.1038/nbt.3843.
  36. Sánchez-Fdez, A.; Re-Louhau, M.F.; Rodríguez-Núñez, P.; Ludeña, D.; Matilla-Almazán, S.; Pandiella, A.; Esparís-Ogando, A. Clinical, Genetic and Pharmacological Data Support Targeting the MEK5 / ERK5 Module in Lung Cancer. *npj Precision Oncology* **2021**, *5*, 78, doi:10.1038/s41698-021-00218-8.
  37. Koo, T.; Yoon, A.-R.; Cho, H.-Y.; Bae, S.; Yun, C.-O.; Kim, J.-S. Selective Disruption of an Oncogenic Mutant Allele by CRISPR / Cas9 Induces Efficient Tumor Regression. *Nucleic Acids Research* **2017**, *45*, 7897–7908, doi:10.1093/nar/gkx490.
  38. Cheung, A.H.-K.; Chow, C.; Zhang, J.; Zhou, Y.; Huang, T.; Ng, K.C.-K.; Or, T.C.-T.; Yao, Y.Y.; Dong, Y.; Fung, J.M.-W.; et al. Specific Targeting of Point Mutations in EGFR L858R -Positive Lung Cancer by CRISPR / Cas9 . *Laboratory Investigation* **2018**, *98*, 968–976, doi:10.1038/s41374-018-0056-1.
  39. Yoon, A.-R.; Jung, B.-K.; Choi, E.; Chung, E.; Hong, J.; Kim, J.-S.; Koo, T.; Yun, C.-O. CRISPR - Cas12a with an oAd Induces Precise and Cancer - Specific Genomic Reprogramming of EGFR and Efficient Tumor Regression . *Molecular Therapy* **2020**, *28*, 2286–2296, doi:10.1016/j.ymthe.2020.07.003.
  40. Gao, Q.; Ouyang, W.; Kang, B.; Han, X.; Xiong, Y.; Ding, R.; Li, Y.; Wang, F.; Huang, L.; Chen, L.; et al. Selective Targeting of the Oncogenic KRAS G12S Mutant Allele by CRISPR / Cas9 Induces Efficient Tumor Regression. *Theranostics* **2020**, *10*, 5137–5153, doi:10.7150/thno.42325.
  41. Tang, N.; Cheng, C.; Zhang, X.; Qiao, M.; Li, N.; Mu, W.; Wei, X.-F.; Han, W.; Wang, H. TGF - $\beta$  Inhibition via CRISPR Promotes the Long-Term Efficacy of CAR T Cells against Solid Tumors. *JCI Insight* **2020**, *5*, e133977, doi:10.1172/jci.insight.133977.
  42. Saifullah; Sakari, M.; Suzuki, T.; Yano, S.; Tsukahara, T. Effective RNA Knockdown Using CRISPR - Cas13a and

Molecular Targeting of the EML4 - ALK Transcript in H3122 Lung Cancer Cells . *International Journal of Molecular Sciences* **2020**, *21*, 8904, doi:10.3390/ijms21238904.

43. Chai, P.; Yu, J.; Jia, R.; Wen, X.; Ding, T.; Zhang, X.; Ni, H.; Jia, R.; Ge, S.; Zhang, H.; et al. Generation of Onco-Enhancer Enhances Chromosomal Remodeling and Accelerates Tumorigenesis. *Nucleic Acids Research* **2020**, *48*, 12135–12150, doi:10.1093/nar/gkaa1051.
44. Wu, X.; Huang, H.; Yu, B.; Zhang, J. A Blue Light - Inducible CRISPR - Cas9 System for Inhibiting Progression of Melanoma Cells . *Frontiers in Molecular Biosciences* **2020**, *7*, 606593, doi:10.3389/fmolb.2020.606593.
45. Haase-Kohn, C.; Laube, M.; Donat, C.K.; Belter, B.; Pietzsch, J. CRISPR / Cas9 Mediated Knockout of Cyclooxygenase -2 Gene Inhibits Invasiveness in A2058 Melanoma Cells . *Cells* **2022**, *11*, 749, doi:10.3390/cells11040749.
46. Biagioni, A.; Chillà, A.; Del Rosso, M.; Fibbi, G.; Scavone, F.; Andreucci, E.; Peppicelli, S.; Bianchini, F.; Calorini, L.; Li Santi, A.; et al. CRISPR / Cas9 uPAR Gene Knockout Results in Tumor Growth Inhibition , EGFR Downregulation and Induction of Stemness Markers in Melanoma and Colon Carcinoma Cell Lines . *Frontiers in Oncology* **2021**, *11*, 663225, doi:10.3389/fonc.2021.663225.
47. Shekoohi, S.; Rajasekaran, S.; Patel, D.; Yang, S.; Liu, W.; Huang, S.; Yu, X.; Witt, S.N. Knocking out Alpha-Synuclein in Melanoma Cells Dysregulates Cellular Iron Metabolism and Suppresses Tumor Growth. *Scientific Reports* **2021**, *11*, 5267, doi:10.1038/s41598-021-84443-y.
48. Garcia-Peterson, L.M.; Ndiaye, M.A.; Chhabra, G.; Singh, C.K.; Guzmán-Pérez, G.; Iczkowski, K.A.; Ahmad, N. CRISPR/Cas9-Mediated Knockout of SIRT6 Imparts Remarkable Anti-Proliferative Response in Human Melanoma Cells in Vitro and in Vivo. *Photochemistry and photobiology* **2020**, *96*, 1314, doi:10.1111/PHP.13305.
49. Zhang, Y.; Zhou, L.; Leng, Y.; Dai, Y.; Orlowski, R.Z.; Grant, S. Positive Transcription Elongation Factor b ( P - TEFb ) Is a Therapeutic Target in Human Multiple Myeloma. *Oncotarget* **2017**, *8*, 59476–59491, doi:10.18632/oncotarget.19761.
50. Pan, S.; Su, Y.; Sun, B.; Hao, R.; Gao, X.; Han, B. Knockout of CD147 Inhibits the Proliferation, Invasion, and Drug Resistance of Human Oral Cancer CAL27 Cells in Vitro and in Vivo . *International Journal of Biological Macromolecules* **2021**, *181*, 378–389, doi:10.1016/j.ijbiomac.2021.03.102.
51. Tang, F.; Min, L.; Seebacher, N.A.; Li, X.; Zhou, Y.; Hornicek, F.J.; Wei, Y.; Tu, C.; Duan, Z. Targeting Mutant TP53 as a Potential Therapeutic Strategy for the Treatment of Osteosarcoma. *Journal of Orthopaedic Research* **2019**, *37*, 789–798, doi:10.1002/jor.24227.
52. Rosenblum, D.; Gutkin, A.; Kedmi, R.; Ramishetti, S.; Veiga, N.; Jacobi, A.M.; Schubert, M.S.; Friedmann-Morvinski, D.; Cohen,

Z.R.; Behlke, M.A.; et al. CRISPR - Cas9 Genome Editing Using Targeted Lipid Nanoparticles for Cancer Therapy. *Science Advances* **2020**, *6*, eabc9450, doi:10.1126/sciadv.abc9450.

53. Ji, L.; Zhao, G.; Zhang, P.; Huo, W.; Dong, P.; Watari, H.; Jia, L.; Pfeiffer, L.M.; Yue, J.; Zheng, J. Knockout of MTF1 Inhibits the Epithelial to Mesenchymal Transition in Ovarian Cancer Cells. *Journal of Cancer* **2018**, *9*, 4578–4585, doi:10.7150/jca.28040.
54. Li, M.; Xie, H.; Liu, Y.; Xia, C.; Cun, X.; Long, Y.; Chen, X.; Deng, M.; Guo, R.; Zhang, Z.; et al. Knockdown of Hypoxia-Inducible Factor-1 Alpha by Tumor Targeted Delivery of CRISPR / Cas9 System Suppressed the Metastasis of Pancreatic Cancer. *Journal of Controlled Release* **2019**, *304*, 204–215, doi:10.1016/j.jconrel.2019.05.019.
55. Jiang, W.; Li, H.; Liu, X.; Zhang, J.; zhang, W.; Li, T.; Liu, L.; Yu, X. Precise and Efficient Silencing of Mutant Kras  $G^{12D}$  by CRISPR - CasRx Controls Pancreatic Cancer Progression. *Theranostics* **2020**, *10*, 11507–11519, doi:10.7150/thno.46642.
56. Albayrak, G.; Konac, E.; Ugras Dikmen, A.; Bilen, C.Y. FOXA1 Knock-out via CRISPR / Cas9 Altered Casp -9, Bax , CCND1 , CDK4 , and Fibronectin Expressions in LNCaP Cells. *Experimental Biology and Medicine* **2018**, *243*, 990–994, doi:10.1177/1535370218791797.
57. Tanaka, K.; Kandori, S.; Sakka, S.; Nitta, S.; Tanuma, K.; Shiga, M.; Nagumo, Y.; Negoro, H.; Kojima, T.; Mathis, B.; et al. ELOVL2 Promotes Cancer Progression by Inhibiting Cell Apoptosis in Renal Cell Carcinoma. *Oncology Reports* **2021**, *47*, 23, doi:10.3892/or.2021.8234.
58. Cervera, S.T.; Rodríguez-Martín, C.; Fernández-Tabanera, E.; de Mera, R.M.; Morin, M.; Fernández-Peñalver, S.; Iranzo-Martínez, M.; Amhah-Cardenas, J.; García-García, L.; González-González, L.; et al. Therapeutic Potential of EWSR1 – FLI1 Inactivation by CRISPR / Cas9 in Ewing Sarcoma. *Cancers* **2021**, *13*, 3783, doi:10.3390/cancers13153783.
59. Lin, C.-L.; Tsai, M.-L.; Lin, C.-Y.; Hsu, K.-W.; Hsieh, W.-S.; Chi, W.-M.; Huang, L.-C.; Lee, C.-H. HDAC1 and HDAC2 Double Knockout Triggers Cell Apoptosis in Advanced Thyroid Cancer. *International Journal of Molecular Sciences* **2019**, *20*, 454, doi:10.3390/ijms20020454.
60. Santa-Inez, D.C. de; Fuziwara, C.S.; Saito, K.C.; Kimura, E.T. Targeting the Highly Expressed microRNA miR -146b with CRISPR / Cas9n Gene Editing System in Thyroid Cancer. *International Journal of Molecular Sciences* **2021**, *22*, 7992, doi:10.3390/ijms22157992.
